# Supplementary material
Source: PubMed Central journal article supplement (PMC3690191)
Supplement: NIHMS484822-supplement-01.pdf [file NIHMS484822-supplement-01.pdf]

## SUPPLEMENTARY ONLINE DATA

### Lipin1 regulates PPAR $\gamma$ transcriptional activity

HeeEun KIM\*, Eunju BAE\*, Deok-yoon JEONG\*, Min-Ji KIM\*, Won-ji JIN\*, Sahng-wook PARK\*, Gil-Soo HAN†, George M. CARMAN†, Eunjin KOH\*<sup>1</sup> and Kyung-Sup KIM\*<sup>1</sup>

\*Department of Biochemistry and Molecular Biology, Brain Korea 21 Project for Medical Science, Institute of Genetic Science, Integrated Genomic Research Center for Metabolic Regulation, Yonsei University College of Medicine, Seoul 120-752, Korea, and †Department of Food Science and Rutgers Center for Lipid Research, Rutgers University, New Brunswick, NJ 08901, U.S.A.

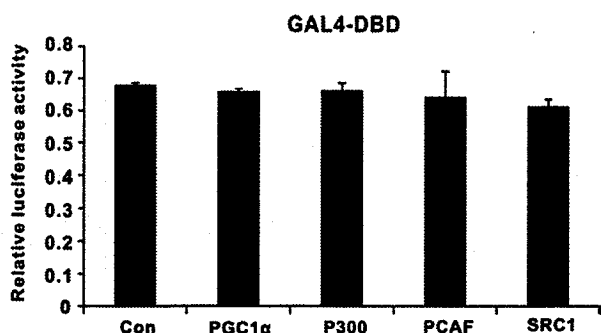

**Figure S1** NIH 3T3 cells were co-transfected with pFR-Luc and GAL4-DBD construct along with co-activator plasmids (PGC-1 $\alpha$ , P300, PCAF and SRC-1) as a control study for Figure 4(B) of the main text

Luciferase activity was normalized to *Renilla* luciferase and the data shown are representative of three independent experiments performed in triplicate. Con, control.

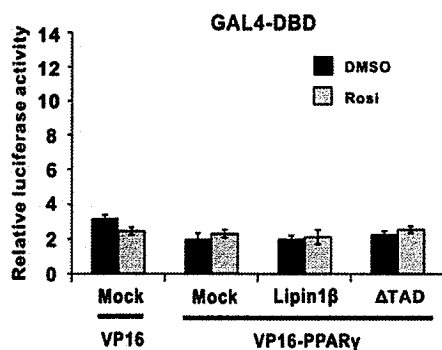

**Figure S2** NIH 3T3 cells were co-transfected with pGAL4-DBD, and pUAS-Luc reporter plasmids along with pVP16-PPAR $\gamma$  and pSG5-FLAG-lipin1 or pSG5-FLAG-lipin1 $\Delta$ TAD as a control study of Figures 7(A) and 7(B) of the main text

Received 17 October 2012/15 April 2013; accepted 30 April 2013  
Published as BJ Immediate Publication 30 April 2013, doi:10.1042/BJ20121598

<sup>1</sup> Correspondence may be addressed to either of these authors (email kohchun@yuhs.ac or kyungsup59@yuhs.ac).
